# Supplementary material
Source: publisher figshare collection journal article supplement (https://acs.figshare.com/ndownloader/files/10149111)
Supplement: Supplementary file 1 [file 10149111]

*Supporting Information*

# **Selective Electrochemical Production of Formate from Carbon Dioxide with Bismuth-Based Catalysts in an Aqueous Electrolyte**

*Chan Woo Lee,<sup>†,§</sup> Jung Sug Hong,<sup>†</sup> Ki Dong Yang,<sup>†</sup> Kyoungsuk Jin,<sup>†</sup> Jun Ho Lee,<sup>†</sup> Hyo-Yong Ahn,<sup>†</sup>  
Hongmin Seo,<sup>†</sup> Nark-Eon Sung,<sup>‡</sup> and Ki Tae Nam<sup>\*,†</sup>*

*<sup>†</sup>Department of Materials Science and Engineering, Seoul National University, Seoul 151-744,  
Korea*

*<sup>‡</sup>Pohang Accelerator Laboratory, Pohang University of Science and Technology, Pohang, 37673,  
Republic of Korea*

*<sup>§</sup>Clean Energy Research Center, Korea Institute of Science and Technology (KIST), 5 Hwarang-ro  
14-gil, Seongbuk-gu, Seoul 02792, Republic of Korea*

*\*Correspondence to: nkitae@snu.ac.kr*

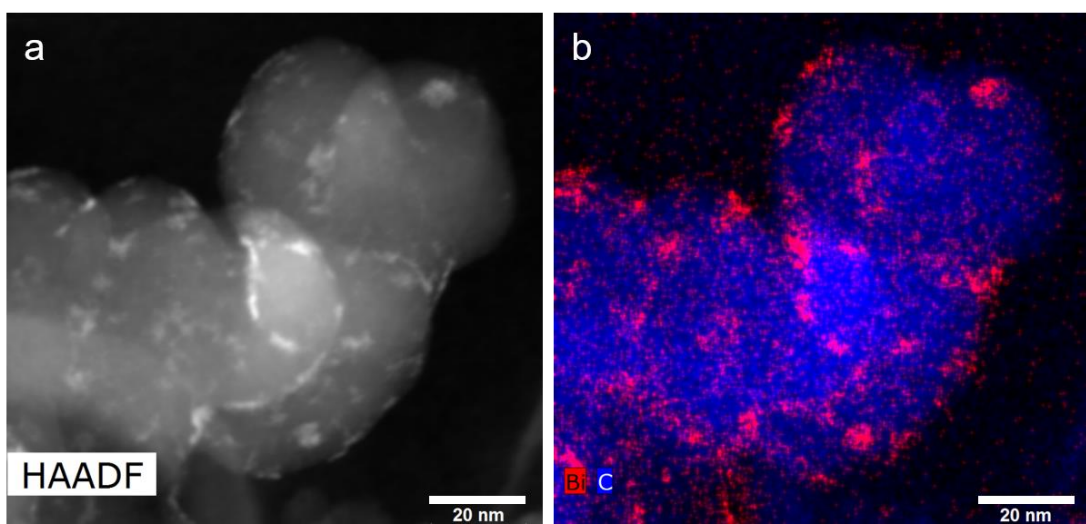

**Figure S1.** (a) STEM image and (b) EDS elemental mapping of the synthesized  $\text{BiO}_x/\text{C}$ .

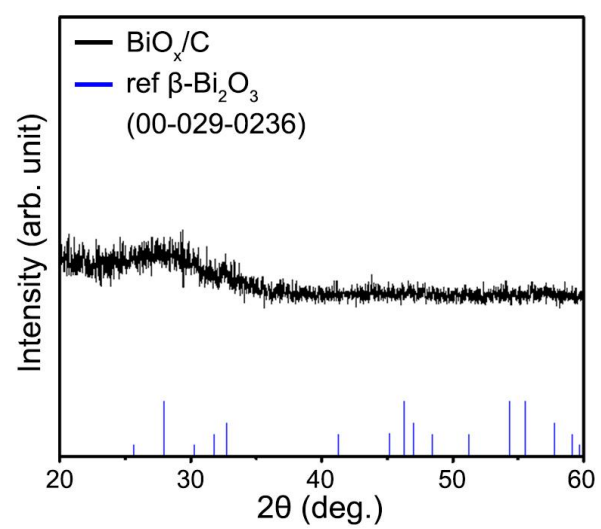

**Figure S2.** The XRD patterns of the synthesized BiO<sub>x</sub>/C.

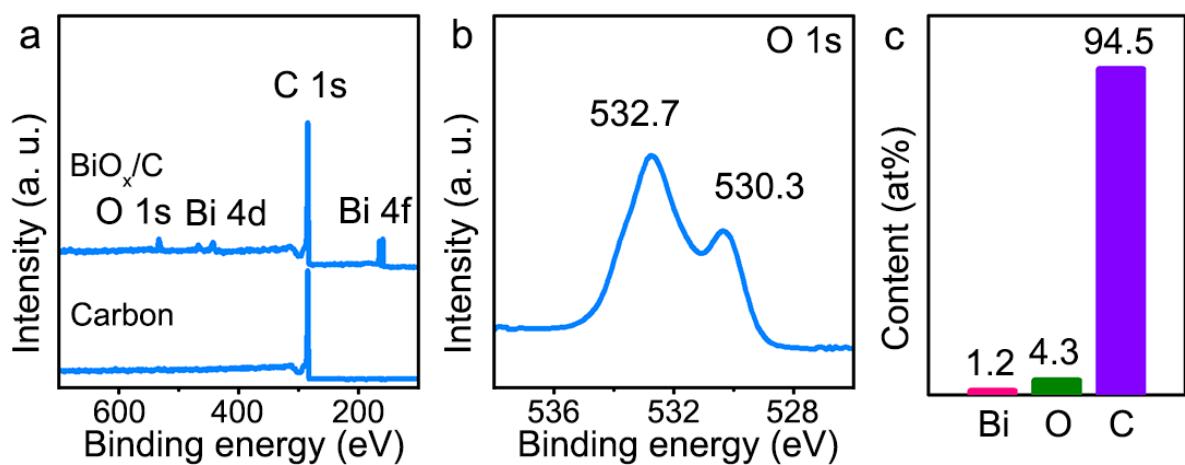

**Figure S3.** (a) Survey XPS and (b) O 1s spectra of the BiO<sub>x</sub>/C. (c) Atomic percentages of Bi, O, and C measured by XPS.

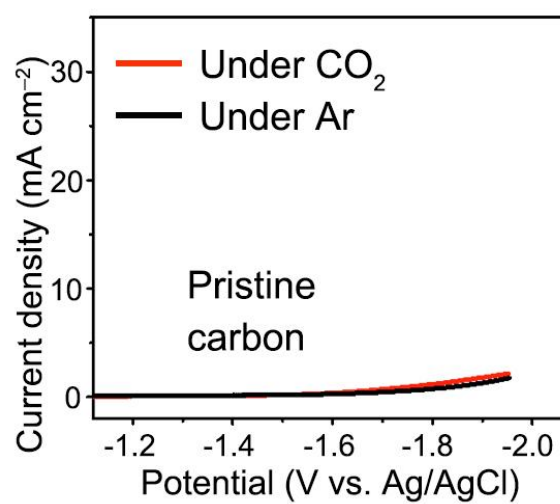

**Figure S4.** Cathodic linear sweep voltammetric scans of carbon black on glassy carbon plate electrode at 50 mV s<sup>-1</sup> in 0.5 M NaHCO<sub>3</sub>/0.5 M NaClO<sub>4</sub> under CO<sub>2</sub> and Ar.

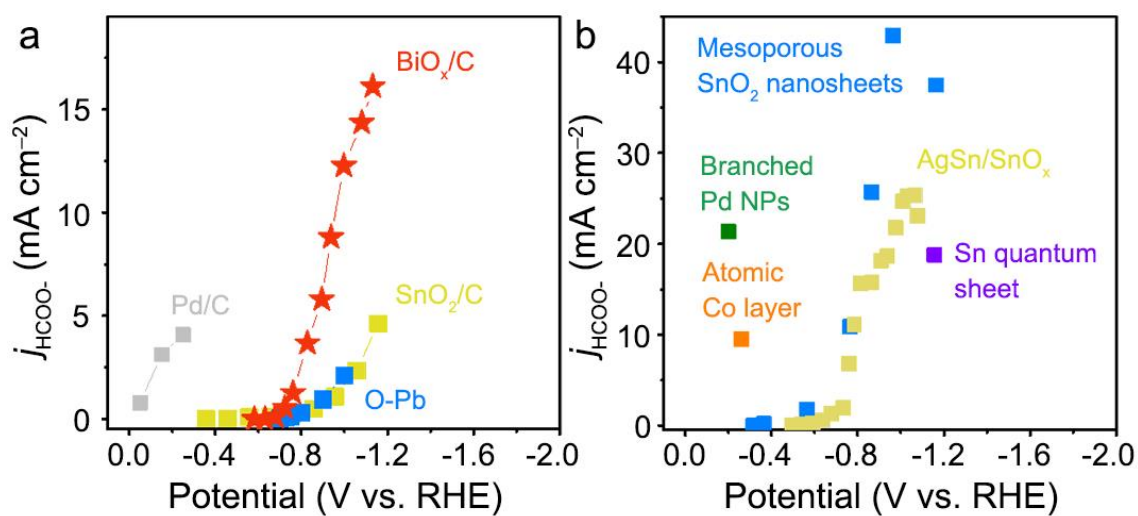

**Figure S5.** Comparison with reported  $\text{HCOO}^-$  catalysts. Data of the reported catalysts were extracted or collected from the previous literatures. The Figure S5(a) includes Pd/C, SnO<sub>2</sub>/C and PbO<sub>2</sub> particle film for the comparison. The Figure S5(b) includes the current state of the art catalysts for  $\text{HCOO}^-$  production.

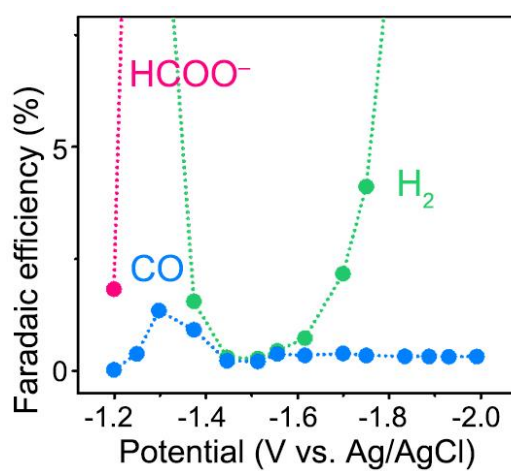

**Figure S6.** An enlarged view of potential dependence of faradaic efficiencies for HCOO<sup>-</sup>, H<sub>2</sub> and CO production.

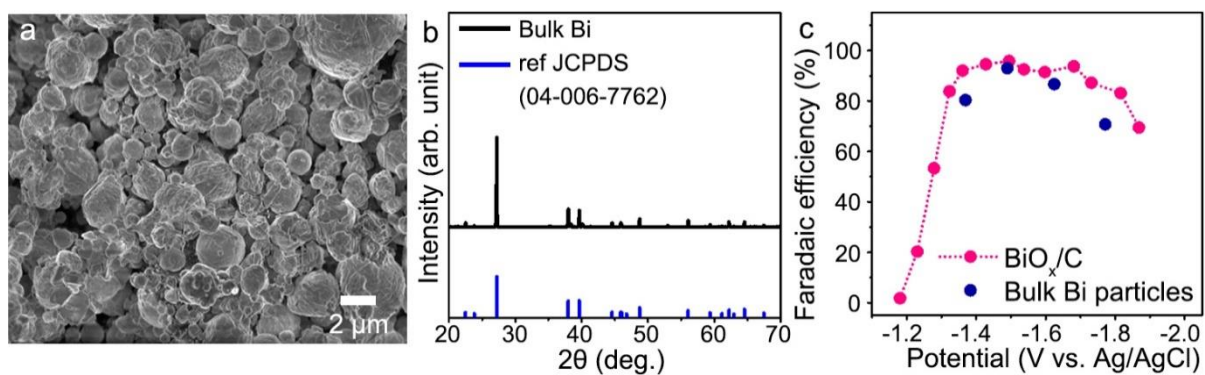

**Figure S7.** (a) Typical FESEM images and (b) XRD patterns of bulk Bi particles. (c) The faradaic efficiency of bulk Bi particles for  $\text{HCOO}^-$  at various potentials.



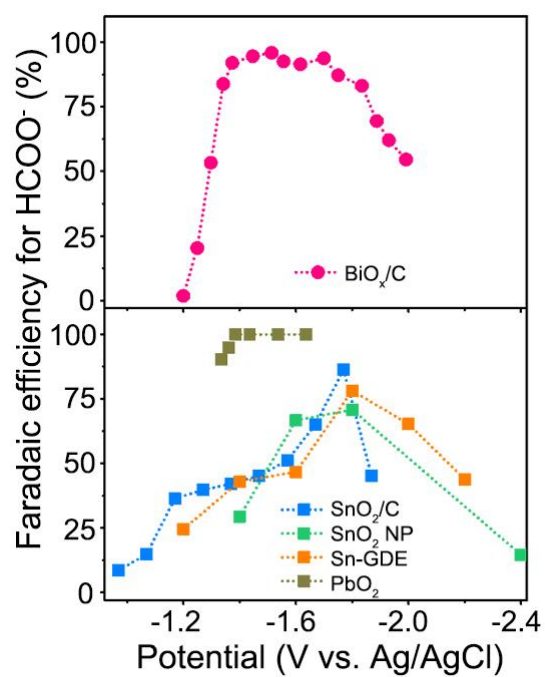

**Figure S8.** Potential dependence of faradaic efficiency for  $\text{HCOO}^-$  and comparison with  $\text{SnO}_2/\text{C}$ ,  $\text{SnO}_2$  NP, Sn-GDE and  $\text{PbO}_2$ . Data were extracted or collected from the previous literatures.

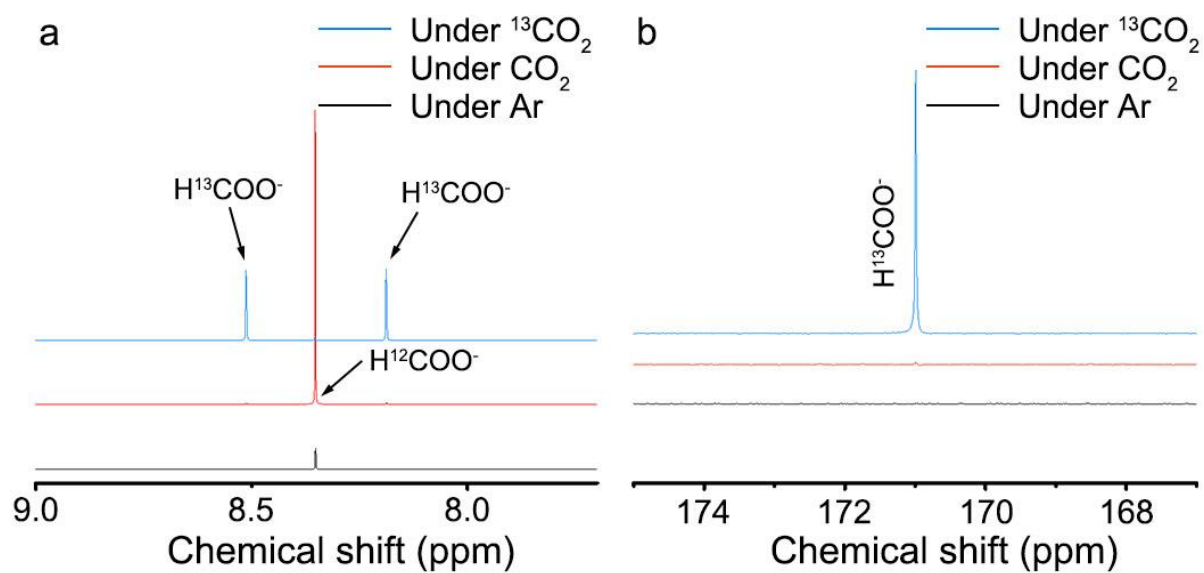

**Figure S9.** (a)  $^1\text{H}$  NMR and (b)  $^{13}\text{C}$  NMR spectra of the resultant solutions after bulk electrolysis at  $-1.51$  V vs. Ag/AgCl under  $\text{CO}_2$ , Ar and  $^{13}\text{CO}_2$  flow.

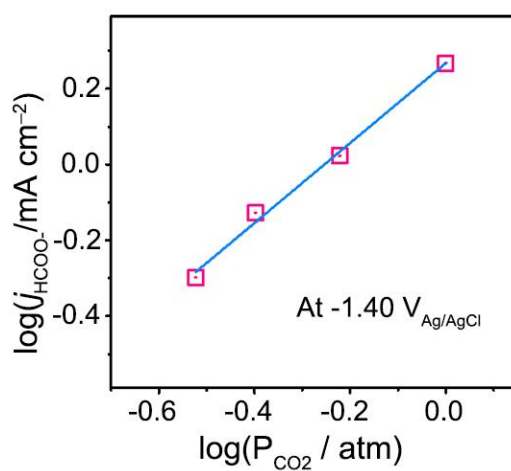

**Figure S10.** Plot of the partial current density for  $\text{HCOO}^-$  as a function of the  $\text{CO}_2$  partial pressure at the fixed potential. The  $\text{CO}_2$  partial pressure was controlled by changing the ratio of the  $\text{CO}_2$  and Ar flows ( $20 \text{ cc min}^{-1}$  in total).

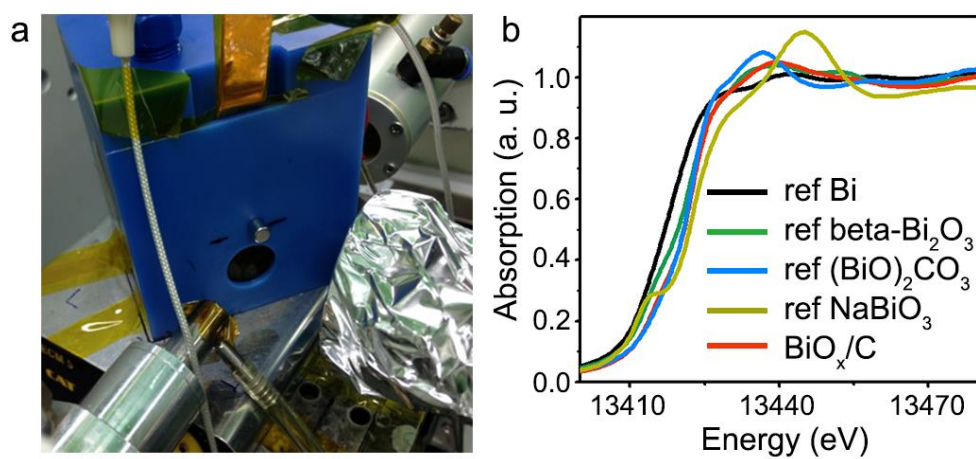

**Figure S11.** (a) A picture of in situ XANES cell. (b) Normalized Bi L<sub>3</sub>-edge XANES spectra of reference Bi,  $\beta$ -Bi<sub>2</sub>O<sub>3</sub>, Bi<sub>2</sub>O<sub>2</sub>CO<sub>3</sub>, NaBiO<sub>3</sub> and BiO<sub>x</sub>/C.

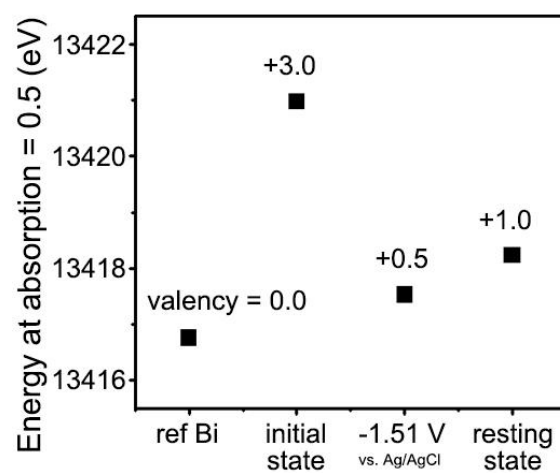

**Figure S12.** Average Bi valencies of Bi metal and BiO<sub>x</sub>/C at the initial state,  $-1.51$  V vs. Ag/AgCl and resting state.

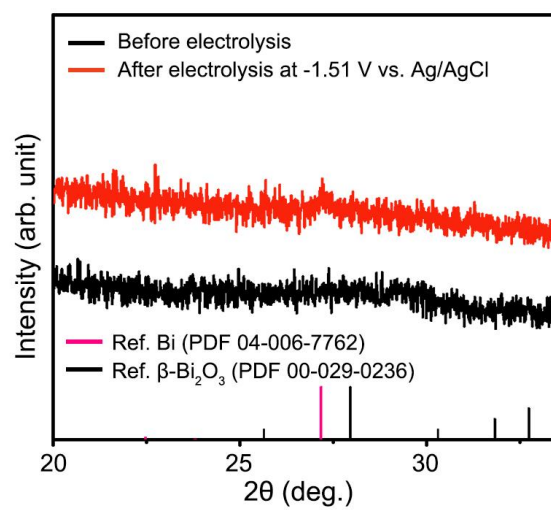

**Figure S13.** XRD patterns of  $\text{BiO}_x/\text{C}$  before and after electrolysis at  $-1.51 \text{ V}$  vs.  $\text{Ag}/\text{AgCl}$ . Bar graphs at the bottom represent the referenced XRD patterns of Bi metal (pink) and  $\beta\text{-Bi}_2\text{O}_3$  (black).

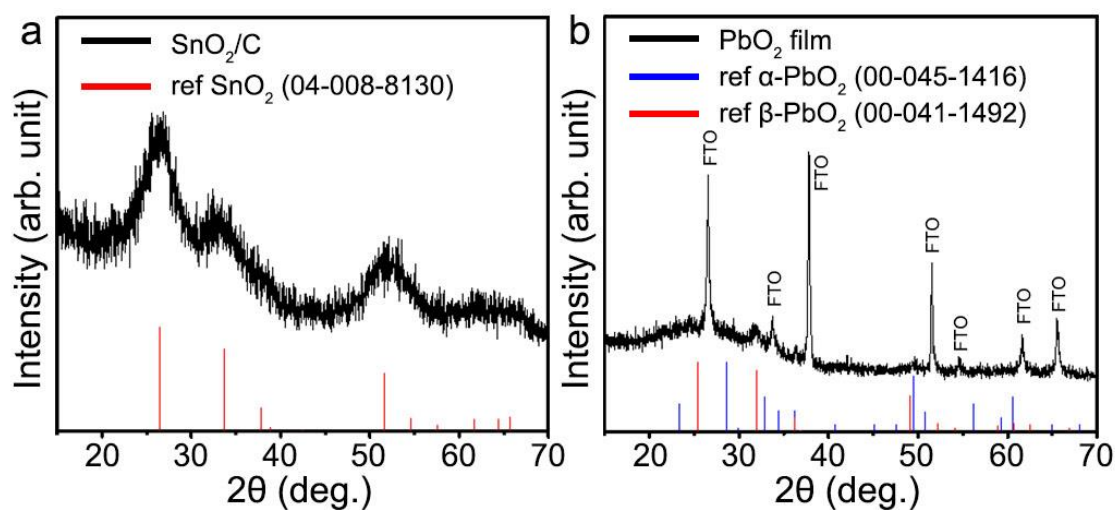

**Figure S14.** XRD patterns of (a) SnO<sub>2</sub>/C powder and (b) PbO<sub>2</sub> film which were synthesized using the experimental methods reported from previous literatures. For XRD analysis, the PbO<sub>2</sub> film was electrodeposited on FTO glass. Bar graphs at the bottom represent the referenced XRD patterns of SnO<sub>2</sub>, α-PbO<sub>2</sub> and β-PbO<sub>2</sub>.

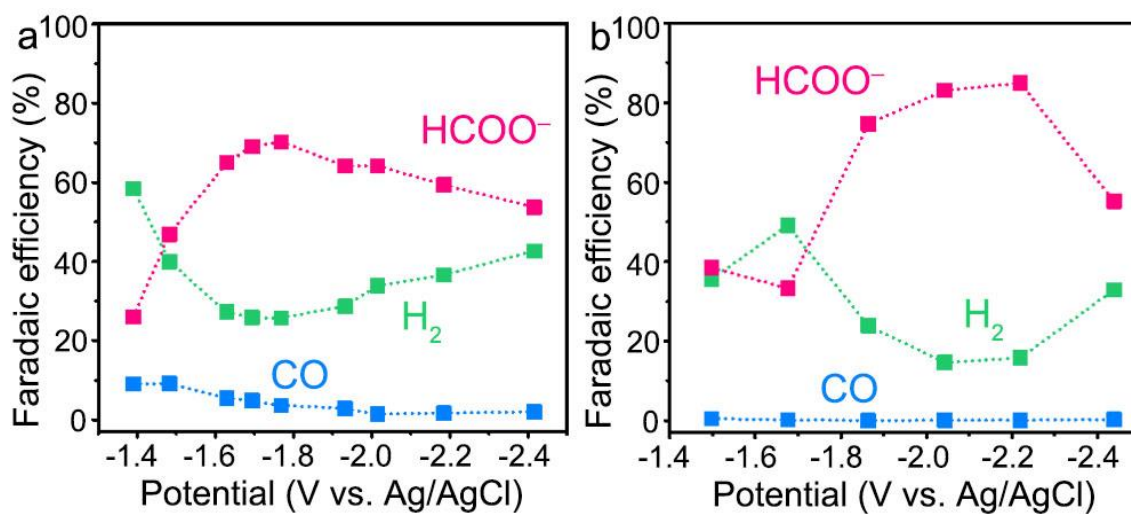

**Figure S15.** Potential dependence of Faradaic efficiencies for  $\text{HCOO}^-$ ,  $\text{H}_2$ , and  $\text{CO}$  production in  $\text{CO}_2$ -saturated  $0.1 \text{ M NaHCO}_3/0.9 \text{ M NaClO}_4$  on (a)  $\text{SnO}_2/\text{C}$  and (b)  $\text{PbO}_2$  film electrodes. The  $\text{SnO}_2/\text{C}$  was dispersed in ethanol with Nafion and drop-coated on a glassy carbon plate. The  $\text{PbO}_2$  film was directly electrodeposited on a glassy carbon plate electrode.



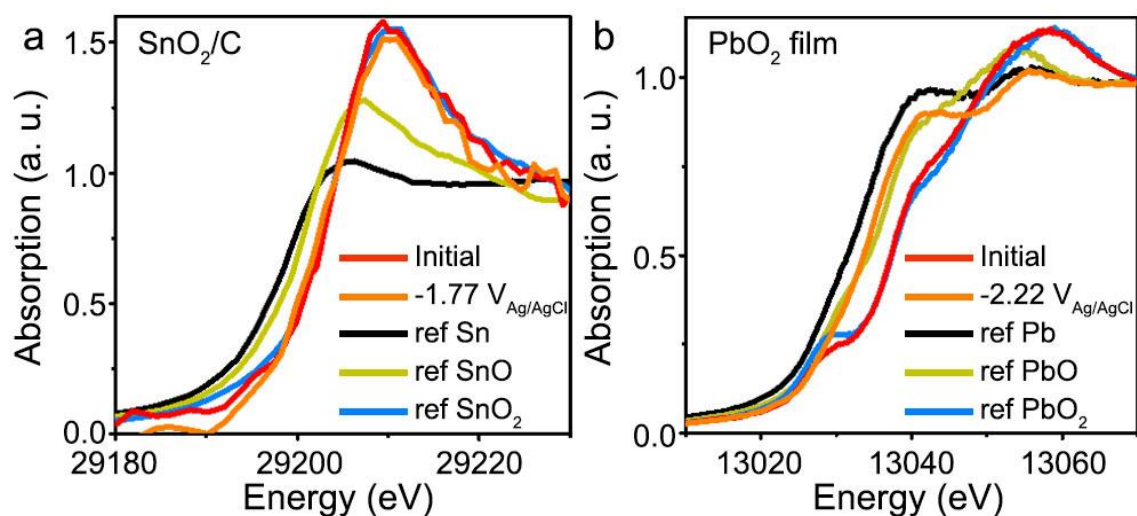

**Figure S16.** (a) Normalized Sn K-edge XANES spectra of ref Sn, ref SnO, ref  $\text{SnO}_2$ , and  $\text{SnO}_2/\text{C}$  at the initial state and  $-1.77$  V vs.  $\text{Ag}/\text{AgCl}$ . (b) Normalized Pb L3-edge XANES spectra of ref Pb, ref PbO, ref  $\text{PbO}_2$ , and  $\text{PbO}_2$  film at the initial state and  $-2.22$  V vs.  $\text{Ag}/\text{AgCl}$ . The electrolysis was conducted at the potentials achieving a maximum faradaic efficiency for  $\text{HCOO}^-$ .

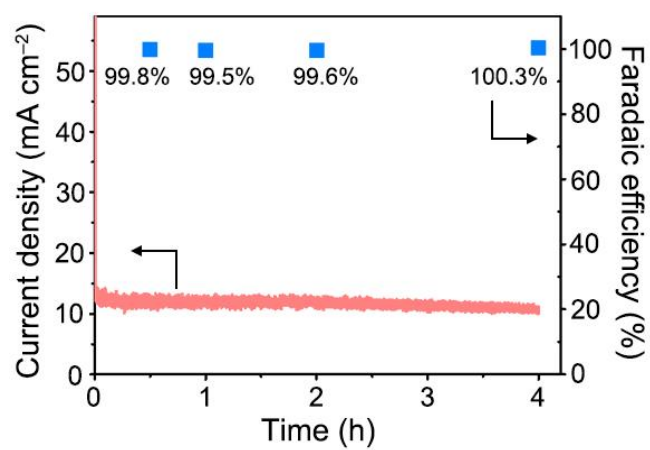

**Figure S17.** Total current densities and Faradaic efficiencies for  $\text{HCOO}^-$  as a function of time at  $-1.65$  V vs. Ag/AgCl in 0.5 M NaCl.

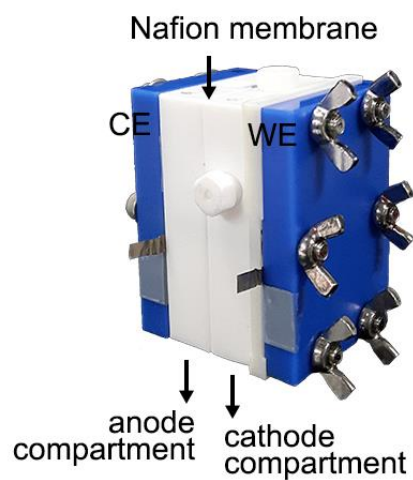

**Figure S18.** A picture of CO<sub>2</sub> reduction cell used in this study. The cell consists of cathode and anode compartments with a piece of Nafion membrane. The working and counter electrodes are inserted between white and blue plates. The separator is inserted between two compartments.
